# Supplementary material for: Early detection of rheumatoid arthritis in rats and humans with 99mTc-3PRGD2 scintigraphy: imaging synovial neoangiogenesis
Source: PubMed Central journal article supplement (PMC5351586; doi:10.18632/oncotarget.13953), 2016-12-15
Supplement: oncotarget-08-5753-s001.pdf [file oncotarget-08-5753-s001.pdf]

## Early detection of rheumatoid arthritis in rats and humans with $^{99m}\text{Tc}$ -3PRGD2 scintigraphy: imaging synovial neoangiogenesis

### Supplementary Material

Supplemental Figure 1

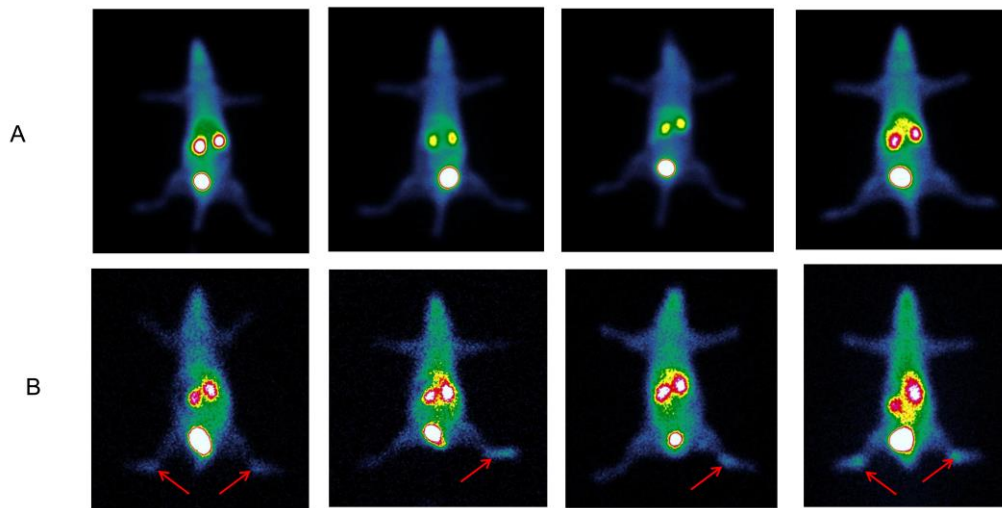

**Supplemental Figure 1.** Receptor imaging with  $^{99m}\text{Tc}$ -3PRGD2 in 4 health rats as controls and 4 rats with rheumatoid arthritis. A: Control; B: Rat with rheumatoid arthritis. An abnormal increase in  $^{99m}\text{Tc}$ -3PRGD2 uptake is evident in rheumatoid arthritis as indicated by the arrows.

**Supplemental Figure 2**

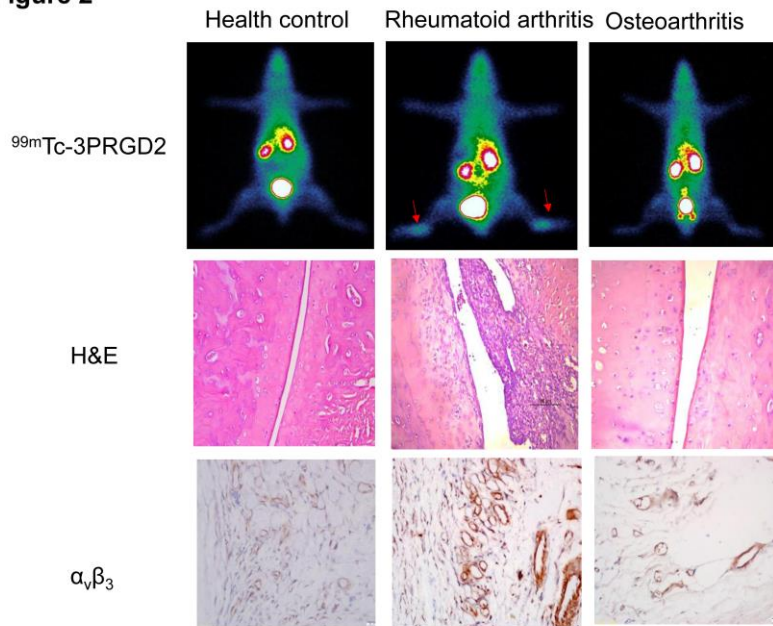

**Supplemental Figure 2.** Comparison  $^{99m}\text{Tc}$ -3PRGD2 uptake among rheumatoid arthritis, osteoarthritis and health rats relating to histological findings. Increase in  $^{99m}\text{Tc}$ -3PRGD2 uptake is observed in rheumatoid arthritis joints,  $^{99m}\text{Tc}$ -3PRGD2 accumulation osteoarthritis joint was not significant different from that in normal joint; overexpression of  $\alpha_v\beta_3$  was found only in rheumatoid arthritis joints.

**Supplemental Figure 3**

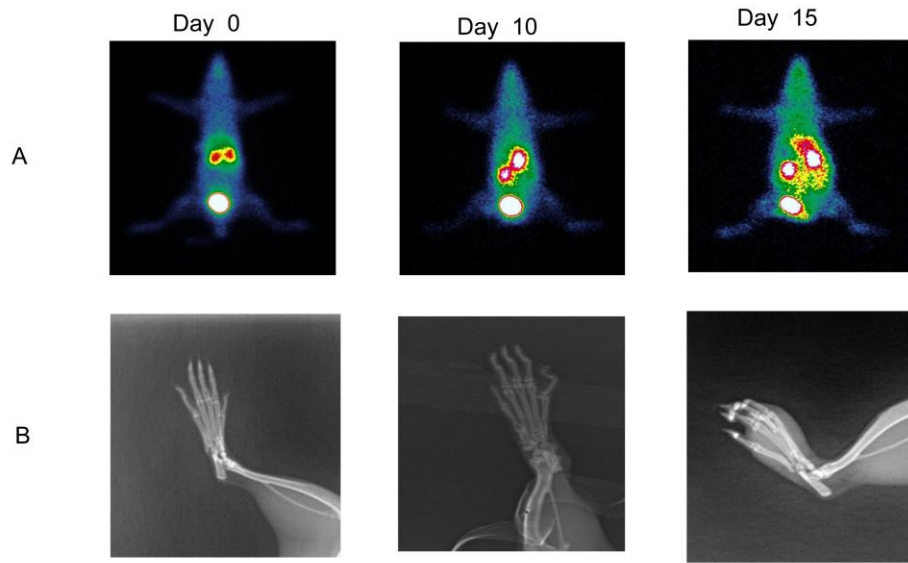

**Supplemental Figure 4**

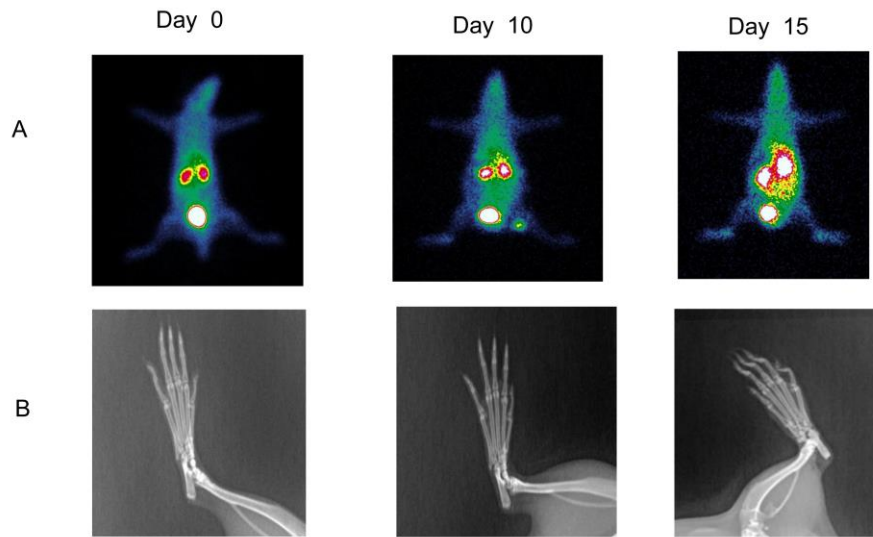

**Supplemental Figure 5**

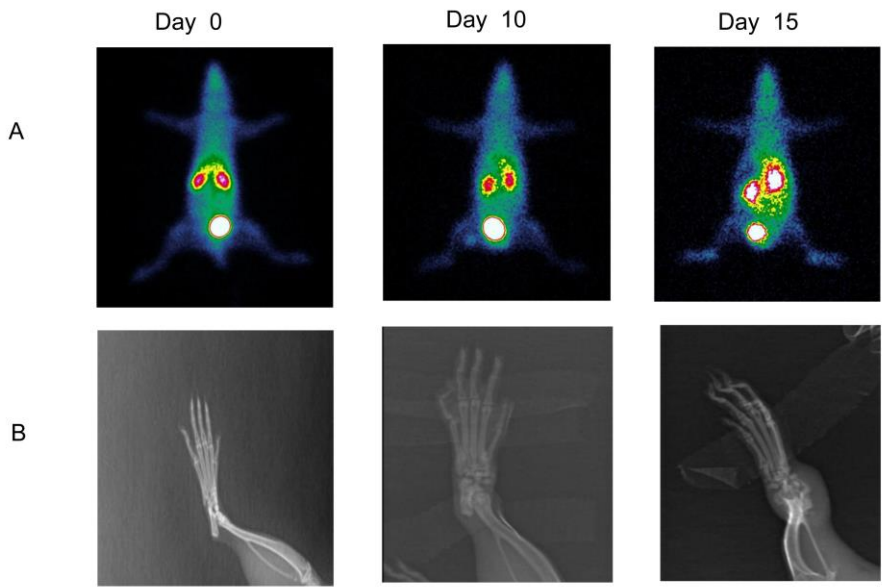

**Supplemental Figure 6**

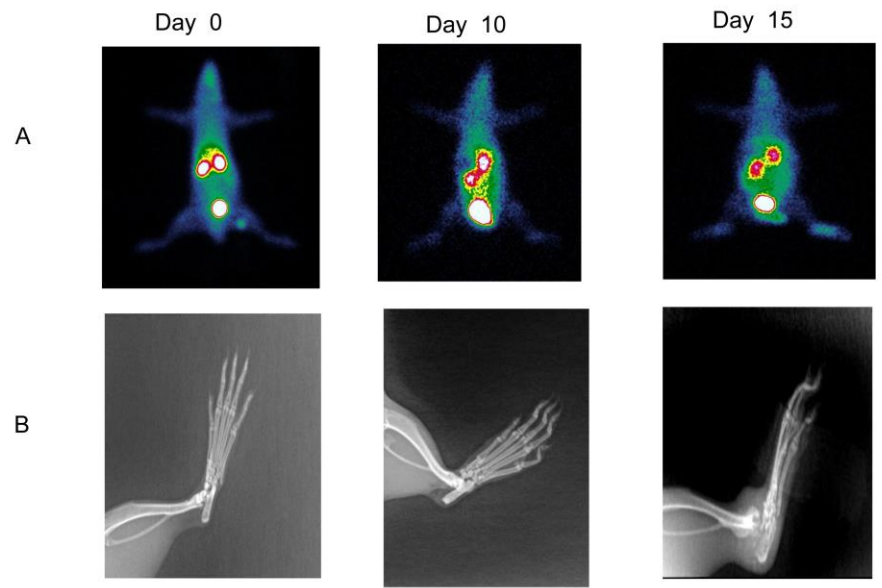

**Supplemental Figure 3-6.**

Temporal changes in rheumatoid arthritis monitored by serial  $^{99m}\text{Tc}$ -3PRGD2 and X-ray imaging in 4 rats in addition to the data presented in Figure 4.

A:  $^{99m}\text{Tc}$ -3PRGD2 scintigraphy prior to, and 15 and 30 days after immunization. Arrow indicates

increased joint uptake. B: Corresponding X-ray images.
